# Supplementary material for: A Pilot Study of a Sensor Enhanced Activity Management System for Promoting Home Rehabilitation Exercise Performed during the COVID-19 Pandemic: Therapist Experience, Reimbursement, and Recommendations for Implementation
Source: MDPI journal article supplement (doi:10.3390/ijerph181910186), 2021-09-28
Supplement: s1 [file s1]

## **Proposed SEAM Training Schedule**

Pre-training: survey on patient population/desired exercises

Initial Training (8 hours)

1. Morning
  - Background/ Aims of the study
  - Pt Pal introduction and navigations
  - Puck/ Clip introduction
  - Android/ iPhone manuals
  - Billing information
  - Documentation in Epic
2. Afternoon
  - Create account
  - Download app on phones
  - Create “testing subjects”
  - Develop sample order set
  - Prescribe exercise program
  - Perform exercises using app on phone and puck/clip
  - Adjust exercises from the Pt Pal portal
  - Refresh to make sure “subjects” receive updated exercise program

Follow up Training Meeting (4 hours)

- Q&A
- Quiz on “test subject” using different case scenarios: adding exercises, modifying exercise prescription, obtaining reports from Pt Pal, submitting appropriate billing codes, etc.

Weekly or bi-weekly meetings (1 hour)

- Enrollment updates
- Troubleshooting
- Hardware/software updates
- Billing reminder

Documentation/ Data or progress retrieval

- In Epic – patient’s chart
- Pt Pal

Technical support hotline

- Monitor seam system usage
- Monitor billing submission
