# Supplementary material for: A Pilot Study of a Sensor Enhanced Activity Management System for Promoting Home Rehabilitation Exercise Performed during the COVID-19 Pandemic: Therapist Experience, Reimbursement, and Recommendations for Implementation
Source: MDPI journal article supplement (doi:10.3390/ijerph181910186), 2021-09-28
Supplement: s1 [file s1]

| SEAM ID | Days of Service | Department | Payer Name                                          | CPT          | Charge       | Reimb        | CPT   | Charge       | Reimb       | Notes                                     |
|---------|-----------------|------------|-----------------------------------------------------|--------------|--------------|--------------|-------|--------------|-------------|-------------------------------------------|
| 1       | 30              | PT         | AETNA<br>MEDICARE<br>MANAGED<br>CARE                | 99453        | \$<br>140.00 | \$<br>134.42 | 99454 | \$<br>42.03  |             | 99457 & 99458 Non-Covered                 |
|         | 31              |            |                                                     |              |              |              |       |              |             | Denied                                    |
| 3       | 28              | OT         | MEDICARE                                            | 99453        | \$<br>140.00 | \$<br>134.42 | 99454 | \$<br>47.00  | \$<br>-     | 99454 pmt included in allowance for 99453 |
|         | 28              |            |                                                     | 99457 x<br>3 | \$<br>139.00 |              | 99458 | \$<br>139.00 |             | Non-Covered                               |
|         | 31              |            |                                                     | 99454        | \$<br>47.00  | \$<br>42.03  |       |              |             | 99457 & 99458 Non-Covered                 |
|         | 28              |            |                                                     | 99457        | \$<br>139.00 |              |       |              |             | Non-Covered                               |
| 4       | 30              | OT         | CIGNA                                               | 99453        | \$<br>140.00 | \$<br>134.68 | 99454 | \$<br>45.21  |             |                                           |
|         | 30              |            |                                                     | 99457        | \$<br>139.00 | \$<br>133.72 | 99457 | \$<br>133.72 |             |                                           |
| 7       | 28              | PT         | BLUE CROSS                                          | 99457        | \$<br>139.00 |              |       |              |             | Contract for PT maxes at \$317 per day    |
|         | 31              |            |                                                     | 99457        | \$<br>139.00 |              |       |              |             | Contract for PT maxes at \$317 per day    |
| 8       | 31              | OT         | BLUE SHIELD                                         | 99457        | \$<br>139.00 |              |       |              |             | non-novered                               |
|         | 29              |            |                                                     | 99458        | \$<br>90.00  |              |       |              |             | Non-Covered                               |
| 9       | 25              | OT         | UNITED<br>HEALTHCARE<br>MEDICARE<br>MANAGED<br>CARE | 99457        | \$<br>139.00 |              |       |              |             | non-covered                               |
|         | 26              |            |                                                     | 99458        | \$<br>90.00  | \$<br>34.97  | 99457 | \$<br>139.00 | \$<br>34.97 |                                           |
| 10      | 23              | PT         | BLUE CROSS                                          | 99453        | \$<br>140.00 |              | 99454 | \$<br>47.00  |             | Contract for PT maxes at \$317 per day    |
