# Supplementary material for: A Pilot Study of a Sensor Enhanced Activity Management System for Promoting Home Rehabilitation Exercise Performed during the COVID-19 Pandemic: Therapist Experience, Reimbursement, and Recommendations for Implementation
Source: Int J Environ Res Public Health. 2021 Sep 28;18(19):10186. doi: 10.3390/ijerph181910186 (PMC8508164; doi:10.3390/ijerph181910186)
Supplement: Supplementary file 1 [file ijerph-18-10186-s001.zip]

Archive with 4 entries (4 files):
- Table S1 - SEAM Study RPM Reimbursement Table.pdf
- Text S1 2020 Pt Pal Billing 30 Patients.pdf
- Text S2 - Data Collection Surveys.pdf
- Text S3 - Proposed SEAM Training Schedule.pdf
